# Supplementary figures and images for: Transient Global Ischemia-Induced Brain Inflammatory Cascades Attenuated by Targeted Temperature Management
Source: MDPI journal article supplement (doi:10.3390/ijms22105114), 2021-05-12

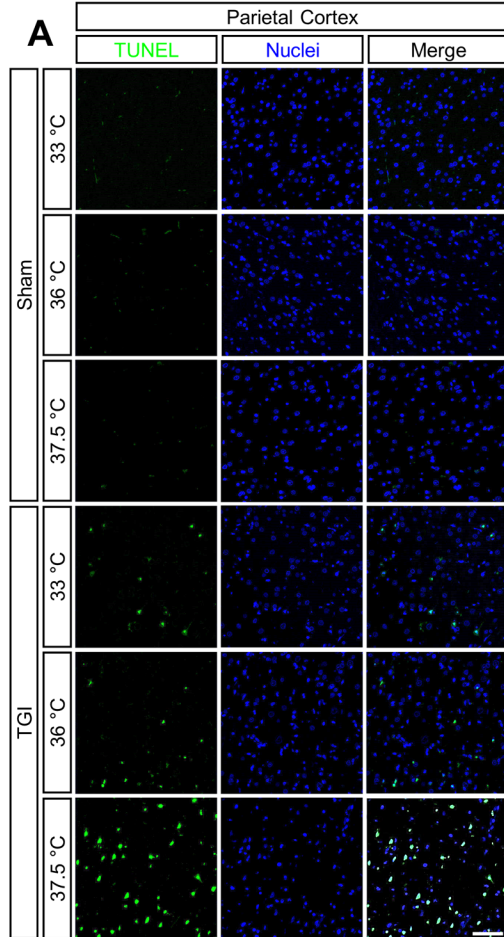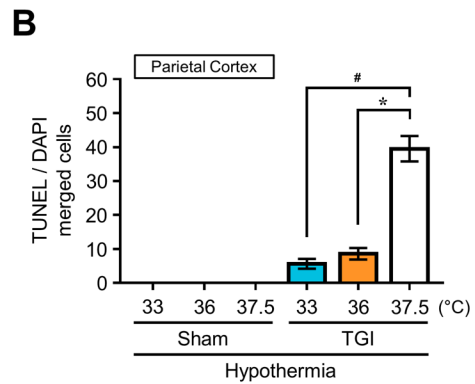

Supplement: s1 [file s1]
